# Supplementary material
Source: publisher figshare collection journal article supplement (https://brill.figshare.com/articles/dataset/_/23178113)
Supplement: Supplementary file 3 [file 1]

## Appendix 1: NATO and Russia Mobilization and Power Projection

| Dominant power               | Forms of maximization                                                                                                                                                                                                                                                                                                                                                                                                                                                                                                                                                                                                                                                                                                                                |
|------------------------------|------------------------------------------------------------------------------------------------------------------------------------------------------------------------------------------------------------------------------------------------------------------------------------------------------------------------------------------------------------------------------------------------------------------------------------------------------------------------------------------------------------------------------------------------------------------------------------------------------------------------------------------------------------------------------------------------------------------------------------------------------|
| <b>NATO mobilization</b>     | <p><b>Internal mobilization</b><br/> Enhanced battle groups in its Eastern and South-eastern part<br/> Air policing for its allies<br/> Upgraded radar system to intercept early launches of missiles since 2012<br/> Upgraded massive ballistic missile defense (BMD) since 2016 in Romania</p> <p><b>External mobilization</b><br/> Fourteen new ally members (since 1997); All of them former communist countries.</p>                                                                                                                                                                                                                                                                                                                            |
| <b>NATO power projection</b> | <p><b>Combat operations</b><br/> 1994 and 1999 Use of force in Bosnia and in Kosovo<br/> 2001 Intervention in Afghanistan<br/> 2011 Intervention in Libya</p> <p><b>Peace missions</b><br/> 1996–2004 Bosnia and Herzegovina<br/> 1999–2003 Kosovo<br/> 2001–16 “Active Endeavour” maritime surveillance in the Mediterranean Sea<br/> 2003–14 Afghanistan<br/> 2004–11 Iraq<br/> 2005–7 Sudan<br/> 2005–6 Pakistani<br/> 2001–3 North Macedonia<br/> 2007–present African Union in Somalia<br/> 2016– present “Sea Guardian” in the Mediterranean Sea<br/> 2018–present Iraq</p> <p>1994–present Partnership for Peace (PfP) program; involved 34 countries: 28 were communist countries and 14 among them became NATO members</p>                  |
| <b>Russia mobilization</b>   | <p><b>Internal mobilization</b><br/> 175% rise in military spending since 2000, putting Russia among the world’s top five military spenders</p> <p>Military spending as a share of gross domestic product (GDP) increases from 2.6% in 2000 to 5.5% in 2016 close to what USSR military expenditure had been (7–11% of GDP)</p> <p>2008–14 Declared reforms included:<br/> All military units’ combat-ready with rapid transfer readiness<br/> Air and sea equipped with S-400 missile system<br/> 2019 Anti-ship missiles deployed on Sredny Peninsula, close to Norway<br/> 2019–20 Huge numbers of missiles and weapons deployed in Kaliningrad<br/> 2014–20 Coastal defense missile system and assault battalions in Russian-occupied Crimea</p> |

|                                |                                                                                                                                                                                                                                                                                                                                                                                                                                                                                                                                                                                                                                                                                                                                                                                                                                                                                                                                                                                                                                                                                                                                                                                                                                          |
|--------------------------------|------------------------------------------------------------------------------------------------------------------------------------------------------------------------------------------------------------------------------------------------------------------------------------------------------------------------------------------------------------------------------------------------------------------------------------------------------------------------------------------------------------------------------------------------------------------------------------------------------------------------------------------------------------------------------------------------------------------------------------------------------------------------------------------------------------------------------------------------------------------------------------------------------------------------------------------------------------------------------------------------------------------------------------------------------------------------------------------------------------------------------------------------------------------------------------------------------------------------------------------|
|                                | <p>150 Russia satellites in orbit</p> <p><b>External military mobilization</b></p> <p><b>2001 Shanghai Cooperation Organization (SCO)</b><sup>ii</sup> Russian–Chinese-led security, political, economic, and energy cooperation with Kazakhstan, Kyrgyzstan, Tajikistan, and Uzbekistan as member states and Mongolia, Iran, Pakistan, and India as observer states.</p> <p><b>2002 Collective Security Treaty Organization (CSTO)</b> Russian-led military alliance with Armenia, Belarus, Kazakhstan, Uzbekistan, Kyrgyzstan, and Tajikistan with military assistance and rapid reaction mechanism.</p> <p>Bilateral agreement to modernize military industry with Venezuela and Cuba, Vietnam, Egypt.</p> <p>Chinese–Russian joint air force patrols in the Asia-Pacific region.</p> <p>Iran and Russia naval drills in the Indian Ocean.</p> <p>Military assistance to Central African Republic, Gabon.</p>                                                                                                                                                                                                                                                                                                                         |
| <b>Russia power projection</b> | <p><b>Combat operations</b><sup>iii</sup></p> <p>2008 Military intervention in Georgia</p> <p>2014 Annexation of part of Ukraine and undeclared war in Eastern Ukraine</p> <p>2015 Military intervention in the Syrian civil war against the rebels</p> <p>2019 Military involvement in Libya in favor of the rebel leader Khalifa Haftar and against the UN-recognized government</p> <p>2020 Russian paramilitary organization Wagner in Mozambique to assist the government to fight jihadist rebels</p> <p>2022 full scale military intervention in Ukraine</p> <p><b>“Peace” missions</b></p> <p>1992–present South Ossetia (Georgia)</p> <p>1992–present Transnistria (Moldova)</p> <p>1993–present Tajikistan</p> <p>1994–present Abkhazia (Georgia)</p> <p>1995–2004 Bosnia under US (not NATO) command</p> <p>1999–2003 Kosovo under NATO command</p> <p>Russian energy resources are tied to Russian security and it was used as a weapon of power and force in Georgia in 2006, in Ukraine in 2005/2006, and 2009, in Estonia in 2007, and in the Czech Republic in 2008.</p> <p>Russia-fostered counter- energy projects: Blue, Nord, and South Stream in response to Western pipeline initiatives BTC, BTE, and Nabucco</p> |

<sup>i</sup> Humanitarian relief operation after the deadly earthquake.

<sup>ii</sup> The importance of the military component of the SCO is denied by heads of state. But anti-terrorist military exercises are frequent, the largest “peace missions” being in 2005 and in 2007, believed to be a demonstration of force to NATO and conveyed two messages: one for the USA/NATO, that Russia and China are in charge of the Central Asia region,

---

and the second for Central Asian countries, to rely less for security assistance on the USA/NATO. Also, the SCO signed a Memorandum of Understanding on military cooperation with the CSTO. For more on why the SCO is a security organization see Marcel De Haas. 2010. "Russia's Foreign Security Policy in the 21st Century: Putin, Medvedev and Beyond". [Roger McDermott](#). 2007. "The Rising Dragon: SCO Peace Mission 2007." Available from: <https://jamestown.org/report/the-rising-dragon-sco-peace-mission-2007/>.

<sup>iii</sup> For Russian global military activity see David Batashvili monitoring for the Georgian Foundation for Strategic and International Studies (GFSIS): Available from: <https://www.gfsis.org/russian-monitor/military-digest>.
