# Supplementary material
Source: publisher figshare collection journal article supplement (https://brill.figshare.com/articles/dataset/_/23178113)
Supplement: Supplementary file 4 [file 1]

## Appendix 2: Russia–NATO dynamics 1994–present

| Time           | Important event                                                                            | Russian reaction                                                                                                                                                                                                                                                                                                                                                       | Result of relationship                                                                  |
|----------------|--------------------------------------------------------------------------------------------|------------------------------------------------------------------------------------------------------------------------------------------------------------------------------------------------------------------------------------------------------------------------------------------------------------------------------------------------------------------------|-----------------------------------------------------------------------------------------|
| January 1994   | Launch of Partnership for Peace (PfP) for Russian army and its satellites                  | Attempts to develop military contacts to reform army and to cooperate in joint military exercises and in case of threats                                                                                                                                                                                                                                               | Constructive relationship                                                               |
| August 1995    | NATO's use of force in Bosnia                                                              | Sharp criticism, seeking of military ally in China (joint declaration) pointing to “multipolar” world<br><br>Russian legislatures' demand for supply of weapons to Serbs                                                                                                                                                                                               | Adversarial confrontation but final acceptance of joint mission under US command        |
| March 1997     | NATO–Russia founding act – a Permanent Joint Council (PJC)                                 | Willingness to have a “voice” in NATO decisions                                                                                                                                                                                                                                                                                                                        | Constructive partnership                                                                |
| June 1999      | NATO's use of force in Kosovo                                                              | Suspension of all institutional links, seeking to establish Russia–Belarus–Serbia alliance. Lawmakers' and top military officials' demand for supply of arms to Serbs<br><br>Military march from Bosnia to occupy Pristina airport and demand for a separate role in NATO operation<br><br>“West 99” Russian–Belarusian military exercises against virtual NATO attack | Adversarial confrontation, later modified demands, joint peacekeeping mission with NATO |
| March 1999     | NATO admitted Warsaw Pact countries into Alliance: Poland, Hungary, and the Czech Republic | Sending of letter of protest to USA and Western countries by Yeltsin                                                                                                                                                                                                                                                                                                   | Adversarial relationship                                                                |
| September 2001 | NATO's operation as a response to 9/11 attack                                              | Russo-Chinese Treaty of Good-Neighborliness and Friendly Cooperation (FCT) including, among other things, military                                                                                                                                                                                                                                                     | Increased fear of NATO's even broader security involvement                              |

|                |                                                                                                                                                                                     |                                                                                                                                                                                                                                                 |                           |
|----------------|-------------------------------------------------------------------------------------------------------------------------------------------------------------------------------------|-------------------------------------------------------------------------------------------------------------------------------------------------------------------------------------------------------------------------------------------------|---------------------------|
|                | outside the Alliance territory                                                                                                                                                      | cooperation and “defense pact” to help each other in case of war                                                                                                                                                                                |                           |
| May 2002       | NATO–Russia council                                                                                                                                                                 | Attempts to have influence on European security                                                                                                                                                                                                 | Constructive partnership  |
| March 2004     | NATO admitted remaining Warsaw Pact countries and former Soviet republics: in all, seven states                                                                                     | Sharp criticism, rhetorical attacks on democracy’s failings in new allies of NATO, especially Baltic states                                                                                                                                     | Adversarial confrontation |
| September 2006 | NATO’s maritime operation “Active Endeavour”                                                                                                                                        | Russian ship’s participation in counter-terrorist training                                                                                                                                                                                      | Constructive partnership  |
| 2007–2018      | From formal declaration until actual construction of an anti-missile shield by the USA in Poland and the Czech Republic. This includes protection of NATO against ballistic rockets | Suspension of missile shield talks with NATO in protest, demanding limitation of the scope of its ballistic missile defense interceptors                                                                                                        | Adversarial confrontation |
| April 2008     | NATO granted Membership Action Plan (MAP) to Albania and Croatia and postponed MAP discussion with Georgia and Ukraine in December                                                  | Warning to take Crimea from Ukraine and fostering of official ties with Georgian separatist regions (Abkhazia and South Ossetia)<br><br>In August military intervention in Georgia and declaration of independence of the two breakaway regions | Adversarial confrontation |
| April 2009     | NATO admitted former Russian Balkan allies into Alliance: Albania and Croatia                                                                                                       | Harsh rhetoric and raising of the issue of territorial nationalism in the Balkans                                                                                                                                                               | Adversarial confrontation |
| June 2017      | NATO admitted former Russian ally into Alliance: Montenegro                                                                                                                         | Activation of anti-NATO media and orthodox groups, cyber-warfare on government websites. Meddling in elections to assassinate pro-NATO candidate                                                                                                | Adversarial confrontation |

|               |                                             |                                                                                                                                                                                                                                                                                                                      |                           |
|---------------|---------------------------------------------|----------------------------------------------------------------------------------------------------------------------------------------------------------------------------------------------------------------------------------------------------------------------------------------------------------------------|---------------------------|
| December 2018 | NATO granted MAP to Bosnia                  | Rhetoric of retaliation.<br>Undermining of stability by supporting secessionist and nationalist forces in multi-ethnic Bosnia. Backing of nationalist Dodik, who warns of secession of Serb entity, Republika Srpska, from Bosnia                                                                                    | Adversarial confrontation |
| March 2020    | NATO admitted North Macedonia into Alliance | Criticism by Russian Ministry of Foreign Affairs of Macedonian government for illegitimate pro-NATO and pro-EU referendum; criticism of NATO for not even being able to settle disputes between Greece and Macedonia, not to mention giving protection. Support for nationalist and anti-NATO party, led by Gruevski | Adversarial confrontation |
